# Supplementary material
Source: publisher figshare collection journal article supplement (https://sage.figshare.com/ndownloader/files/12833633)
Supplement: Supplementary file 1 [file 12833633]

## **Supplemental Table 1- Maintenance of Certification (MOC) Survey Parameters**

Have you actively practiced anatomic and/or clinical pathology during the past two years?

How long ago did you complete your last year of residency training?

Years in Practice (3 years or fewer, 3+ to 5 years, 5+ to 10 years)

In what ABP primary specialty are you certified? (AP, AP/CP, AP/NP, CP, I only have subspecialty ABP certification)

Fellowship - I have not completed a subspecialty fellowship

Fellowship - Surgical Pathology

Fellowship - Blood Banking/Transfusion Medicine

Fellowship - Bone and Soft Tissue Pathology

Fellowship - Breast Pathology

Fellowship - Cardiovascular Pathology

Fellowship - Chemistry

Fellowship - Cytopathology

Fellowship - Dermatopathology

Fellowship - Diagnostic Immunology

Fellowship - Forensic Pathology

Fellowship - Gastrointestinal Pathology

Fellowship - Genitourinary Pathology

Fellowship - Gynecologic Pathology

Fellowship - Hematopathology

Fellowship - Medical Microbiology

Fellowship - Medical Renal Pathology

Fellowship - Molecular Genetic/Genomic Pathology

Fellowship - Neuropathology

Fellowship - Pathology Informatics

Fellowship - Pediatric Pathology

Fellowship - Pulmonary/Mediastinal Pathology

Fellowship - Other, please specify

Medical Autopsy - IMPORTANCE TO PRACTICE

Medical Autopsy - AMOUNT OF TRAINING

Forensic Autopsy - IMPORTANCE TO PRACTICE

Forensic Autopsy - AMOUNT OF TRAINING

General Surgical/Oncologic Pathology - IMPORTANCE TO PRACTICE

General Surgical/Oncologic Pathology - AMOUNT OF TRAINING

Bone and Soft Tissue Pathology - IMPORTANCE TO PRACTICE

Bone and Soft Tissue Pathology - AMOUNT OF TRAINING

Breast Pathology - IMPORTANCE TO PRACTICE

Breast Pathology - AMOUNT OF TRAINING

Cardiovascular Pathology - IMPORTANCE TO PRACTICE

Cardiovascular Pathology - AMOUNT OF TRAINING

Dermatopathology - IMPORTANCE TO PRACTICE

Dermatopathology - AMOUNT OF TRAINING  
Endocrine Pathology - IMPORTANCE TO PRACTICE  
Endocrine Pathology - AMOUNT OF TRAINING  
Gastrointestinal Pathology (including liver, gallbladder, and pancreas) -  
IMPORTANCE TO PRACTICE  
Gastrointestinal Pathology (including liver, gallbladder, and pancreas) - AMOUNT  
OF TRAINING  
Genitourinary Pathology - IMPORTANCE TO PRACTICE  
Genitourinary Pathology - AMOUNT OF TRAINING  
Gynecologic Pathology - IMPORTANCE TO PRACTICE  
Gynecologic Pathology - AMOUNT OF TRAINING  
Head and Neck Pathology - IMPORTANCE TO PRACTICE  
Head and Neck Pathology - AMOUNT OF TRAINING  
Hematopathology (surgical pathology) - IMPORTANCE TO PRACTICE  
Hematopathology (surgical pathology) - AMOUNT OF TRAINING  
Medical Renal Pathology - AMOUNT OF TRAINING  
Neuropathology - IMPORTANCE TO PRACTICE  
Neuropathology - AMOUNT OF TRAINING  
Pediatric Pathology - IMPORTANCE TO PRACTICE  
Pediatric Pathology - AMOUNT OF TRAINING  
Placental/Perinatal Pathology - IMPORTANCE TO PRACTICE  
Placental/Perinatal Pathology - AMOUNT OF TRAINING  
Pulmonary/Mediastinal Pathology - IMPORTANCE TO PRACTICE  
Pulmonary/Mediastinal Pathology - AMOUNT OF TRAINING  
Transplant Pathology - IMPORTANCE TO PRACTICE  
Transplant Pathology - AMOUNT OF TRAINING  
Frozen Section Procedure - IMPORTANCE TO PRACTICE  
Frozen Section Procedure - AMOUNT OF TRAINING  
Gross Description/Dissection - IMPORTANCE TO PRACTICE  
Gross Description/Dissection - AMOUNT OF TRAINING  
Cytopathology—Gynecologic - IMPORTANCE TO PRACTICE  
Cytopathology—Gynecologic - AMOUNT OF TRAINING  
Cytopathology—Non-Gynecologic - IMPORTANCE TO PRACTICE  
Cytopathology—Non-Gynecologic - AMOUNT OF TRAINING  
FNA Procedure - IMPORTANCE TO PRACTICE  
FNA Procedure - AMOUNT OF TRAINING  
Blood Banking/Transfusion Medicine - IMPORTANCE TO PRACTICE  
Blood Banking/Transfusion Medicine - AMOUNT OF TRAINING  
Blood Center Donor Services - IMPORTANCE TO PRACTICE  
Blood Center Donor Services - AMOUNT OF TRAINING  
Apheresis - IMPORTANCE TO PRACTICE  
Apheresis - AMOUNT OF TRAINING  
Clinical Chemistry - IMPORTANCE TO PRACTICE  
Clinical Chemistry - AMOUNT OF TRAINING  
Electrophoresis - IMPORTANCE TO PRACTICE  
Electrophoresis - AMOUNT OF TRAINING

Immunology/Serology - IMPORTANCE TO PRACTICE  
Immunology/Serology - AMOUNT OF TRAINING  
Toxicology - IMPORTANCE TO PRACTICE  
Toxicology - AMOUNT OF TRAINING  
Urinalysis - IMPORTANCE TO PRACTICE  
Urinalysis - AMOUNT OF TRAINING  
Hematopathology (lymph nodes, spleen, etc.) - IMPORTANCE TO PRACTICE  
Hematopathology (lymph nodes, spleen, etc.) - AMOUNT OF TRAINING  
Laboratory Hematology (bone marrows, peripheral blood) - IMPORTANCE TO PRACTICE  
Laboratory Hematology (bone marrows, peripheral blood) - AMOUNT OF TRAINING  
Bone Marrow Procedure Performance - IMPORTANCE TO PRACTICE  
Bone Marrow Procedure Performance - AMOUNT OF TRAINING  
Flow Cytometry - IMPORTANCE TO PRACTICE  
Flow Cytometry - AMOUNT OF TRAINING  
Coagulation - IMPORTANCE TO PRACTICE  
Coagulation - AMOUNT OF TRAINING  
Medical Microbiology - IMPORTANCE TO PRACTICE  
Medical Microbiology - AMOUNT OF TRAINING  
Molecular Microbiology - IMPORTANCE TO PRACTICE  
Molecular Microbiology - AMOUNT OF TRAINING  
Molecular Diagnostics - IMPORTANCE TO PRACTICE  
Molecular Diagnostics - AMOUNT OF TRAINING  
Whole Genome Sequencing (NGS) - IMPORTANCE TO PRACTICE  
Whole Genome Sequencing (NGS) - AMOUNT OF TRAINING  
Cytogenetics - IMPORTANCE TO PRACTICE  
Cytogenetics - AMOUNT OF TRAINING  
Tissue Typing (HLA) - IMPORTANCE TO PRACTICE  
Tissue Typing (HLA) - AMOUNT OF TRAINING  
Clinical Consultations (e.g., communications, test selection and interpretation, participation in multidisciplinary conferences/tumor boards) - IMPORTANCE TO PRACTICE  
Clinical Consultations (e.g., communications, test selection and interpretation, participation in multidisciplinary conferences/tumor boards) - AMOUNT OF TRAINING  
Laboratory Administration (including quality management, regulatory compliance and accreditation) - IMPORTANCE TO PRACTICE  
Laboratory Administration (including quality management, regulatory compliance and accreditation) - AMOUNT OF TRAINING  
Medical Coding and Billing - IMPORTANCE TO PRACTICE  
Medical Coding and Billing - AMOUNT OF TRAINING  
Pathology Informatics - IMPORTANCE TO PRACTICE  
Pathology Informatics - AMOUNT OF TRAINING  
Research Methods/Grant Writing - IMPORTANCE TO PRACTICE  
Research Methods/Grant Writing - AMOUNT OF TRAINING

Special Laboratory Techniques (e.g., Immunohistochemistry, FISH, PCR, mass spectrometry, etc.) - IMPORTANCE TO PRACTICE

Special Laboratory Techniques (e.g., Immunohistochemistry, FISH, PCR, mass spectrometry, etc.) - AMOUNT OF TRAINING

Progressive Responsibility - Sign-out and report at least some cases (e.g., frozen sections or select surgicals) prior to review by attending pathologist.

Progressive Responsibility - Preliminary sign-out and report at least some cases (e.g., hot seat or immediate review of outside consultations) prior to review by attending pathologist.

Progressive Responsibility - Simulated sign-out of at least some cases (e.g., order stains and enter diagnoses into reporting system, but without reporting) prior to review by an attending pathologist.

Progressive Responsibility - Proposing stains and drafting diagnoses, without ordering stains or entering diagnoses into reporting system prior to review by an attending pathologist.

Upon starting your first post-training position, did you feel that your residency training provided sufficient progressive diagnostic responsibility to permit you to practice at the level expected by your employer?

Within the response options below, identify one to three area(s) in which additional training would have been most useful in preparation for your current role. Explain what additional training would have been beneficial.

What additional comments do you have about your pathology training?

How many autopsies do you sign out each year?

Role - Staff Pathologist/Member of Group

Role - CLIA Medical Director

Role - University/Medical School Faculty

Role - Section Head/Manager/Supervisor

Role - Other, please specify:

Which of the following best describes your primary laboratory or practice setting (i.e., the setting in which you spend most of your time)? (Select only one.)

Practice Setting - Academic Medical Center (i.e., a hospital with an ACGME Pathology Residency)

Practice Setting - A hospital other than an academic medical center

Practice Setting - Central laboratory (AP/CP) for multiple hospitals

Practice Setting - Stand-alone laboratory (laboratory not located in or associated with a hospital)

Practice Setting - Specialty Laboratory (laboratories focused on specific tests)

Practice Setting - Physician Office Laboratory (non-pathologist owned)

Practice Setting - Forensic laboratory/medical examiner office

Practice Setting - Military/Federal Government

Practice Setting - Other, please specify:

Number of Full-Time Pathologists:

Number of Part-Time Pathologists:

What is your primary area of practice?

Subspecialty - General Surgical/Oncologic Pathology

Subspecialty - Blood Banking/Transfusion Medicine

Subspecialty - Bone and Soft Tissue Pathology  
Subspecialty - Breast Pathology  
Subspecialty - Cardiovascular Pathology  
Subspecialty - Chemistry  
Subspecialty - Cytopathology  
Subspecialty - Dermatopathology  
Subspecialty - Diagnostic Immunology  
Subspecialty - Forensic Pathology  
Subspecialty - Gastrointestinal Pathology  
Subspecialty - Genitourinary Pathology  
Subspecialty - Gynecologic Pathology  
Subspecialty - Hematopathology  
Subspecialty - Medical Microbiology  
Subspecialty - Medical Renal Pathology  
Subspecialty - Molecular Genetic/Genomic Pathology  
Subspecialty - Neuropathology  
Subspecialty - Pathology Informatics  
Subspecialty - Pediatric Pathology  
Subspecialty - Pulmonary/Mediastinal Pathology  
Subspecialty - Other, please specify:

Number of Residents:

How many non-fellowship positions have you had as a pathologist since completing your last year of residency/fellowship training?

New position - Did not like current position

New position - Was asked to resign or was terminated

New position - Practice was being downsized

New position - Wanted to move to a different geographic location

New position - Looking for better mix of duties

New position - Looking for better salary/benefits

New position - Looking for better opportunities for advancement

New position - Looking for better work culture/personality fit

New position - Other, please explain:

Practice Size (5 or fewer full time pathologists, 6 to 15 full time pathologists, 16 or more full time pathologists)

**Supplemental Table 2 – Practice Areas & Related Fellowships**

| PRACTICE AREA                                                           | RELATED FELLOWSHIP                                                                        |
|-------------------------------------------------------------------------|-------------------------------------------------------------------------------------------|
| Medical Autopsy                                                         | Forensic Pathology                                                                        |
| Forensic Autopsy                                                        | Forensic Pathology                                                                        |
| General Surgical/Oncologic Pathology                                    | General Surgical/Oncologic Pathology                                                      |
| Bone and Soft Tissue Pathology                                          | General Surgical/Oncologic Pathology, and Bone and Soft Tissue Pathology                  |
| Breast Pathology                                                        | General Surgical/Oncologic Pathology, Breast Pathology, and Women's Health Pathology      |
| Cardiovascular Pathology                                                | General Surgical/Oncologic Pathology, and Cardiovascular Pathology                        |
| Dermatopathology                                                        | Dermatopathology                                                                          |
| Endocrine Pathology                                                     | General Surgical/Oncologic Pathology, and Endocrine Pathology                             |
| Gastrointestinal Pathology (including liver, gallbladder, and pancreas) | General Surgical/Oncologic Pathology, Gastrointestinal Pathology, and Liver Pathology     |
| Genitourinary Pathology                                                 | General Surgical/Oncologic Pathology, and Genitourinary Pathology                         |
| Gynecologic Pathology                                                   | General Surgical/Oncologic Pathology, Gynecologic Pathology, and Women's Health Pathology |
| Hematopathology (surgical pathology)                                    | General Surgical/Oncologic Pathology, and Hematopathology                                 |
| Head and Neck Pathology                                                 | General Surgical/Oncologic Pathology, and Head and Neck Pathology                         |
| Medical Renal Pathology                                                 | Medical Renal Pathology                                                                   |
| Neuropathology                                                          | Neuropathology                                                                            |
| Pediatric Pathology                                                     | General Surgical/Oncologic Pathology, and Pediatric Pathology                             |
| Placental/Perinatal Pathology                                           | General Surgical/Oncologic Pathology                                                      |
| Pulmonary/Mediastinal Pathology                                         | General Surgical/Oncologic Pathology, and Pulmonary/Mediastinal Pathology                 |
| Transplant Pathology                                                    | Medical Renal Pathology                                                                   |
| Frozen Section Procedure                                                | General Surgical/Oncologic Pathology                                                      |
| Gross Description/Dissection                                            | General Surgical/Oncologic Pathology                                                      |
| Cytopathology-Gynecologic                                               | Cytopathology                                                                             |
| Cytopathology-Non-Gynecologic                                           | Cytopathology                                                                             |
| FNA Procedure                                                           | Cytopathology                                                                             |
| Blood Banking/Transfusion Medicine                                      | Blood Banking/Transfusion Medicine                                                        |
| Blood Center Donor Services                                             | Blood Banking/Transfusion Medicine                                                        |
| Apheresis                                                               | Blood Banking/Transfusion Medicine                                                        |

|                                                                                                                                    |                                                                                                           |
|------------------------------------------------------------------------------------------------------------------------------------|-----------------------------------------------------------------------------------------------------------|
| Clinical Chemistry                                                                                                                 | Chemistry                                                                                                 |
| Electrophoresis                                                                                                                    | Chemistry                                                                                                 |
| Immunology/Serology                                                                                                                | Chemistry                                                                                                 |
| Toxicology                                                                                                                         | Chemistry                                                                                                 |
| Urinalysis                                                                                                                         | Chemistry                                                                                                 |
| Hematopathology (lymph nodes, spleen, etc.)                                                                                        | Hematopathology                                                                                           |
| Laboratory Hematology (bone marrows, peripheral blood)                                                                             | Hematopathology                                                                                           |
| Bone Marrow Procedures                                                                                                             | Hematopathology                                                                                           |
| Flow Cytometry                                                                                                                     | Hematopathology                                                                                           |
| Coagulation                                                                                                                        | Hematopathology                                                                                           |
| Medical Microbiology                                                                                                               | Medical Microbiology                                                                                      |
| Molecular Microbiology                                                                                                             | Medical Microbiology, and Molecular Genetic Pathology                                                     |
| Molecular Diagnostics                                                                                                              | Molecular Genetic Pathology, Molecular Oncologic Research, Translational Pathology, and Cancer Biomarkers |
| Whole Genome Sequencing (NGS)                                                                                                      | Molecular Genetic Pathology                                                                               |
| Cytogenetics                                                                                                                       | Molecular Genetic Pathology                                                                               |
| Tissue Typing (HLA)                                                                                                                | Molecular Genetic Pathology, Blood Banking/Transfusion Medicine, and Clinical Histocompatibility          |
| Clinical Consultation (e.g., communication related to test selection, participation in multidisciplinary conferences/tumor boards) | None                                                                                                      |
| Laboratory Administration (including quality management, regulatory compliance and accreditation)                                  | None                                                                                                      |
| Medical Coding and Billing                                                                                                         | None                                                                                                      |
| Pathology Informatics                                                                                                              | Pathology Informatics                                                                                     |
| Research Methods/Grant Writing                                                                                                     | None                                                                                                      |
| Special Laboratory Techniques (e.g., Immunohistochemistry, FISH, PCR, Mass spectrometry)                                           | None                                                                                                      |
